# Supplementary material for: Endosperm-specific expression of human acid beta-glucosidase in a waxy rice
Source: PubMed Central journal article supplement (PMC4883710; doi:10.1186/1939-8433-5-34), 2012-12-06

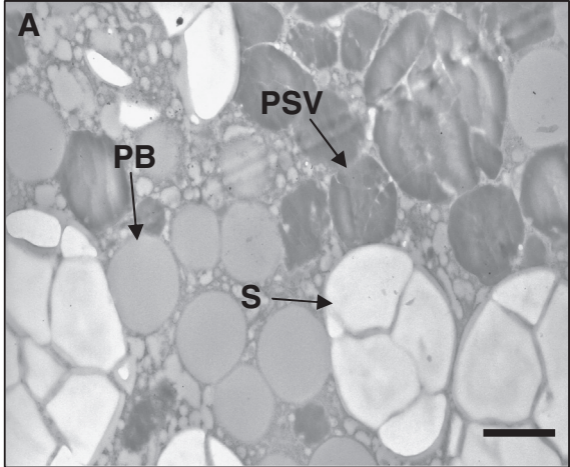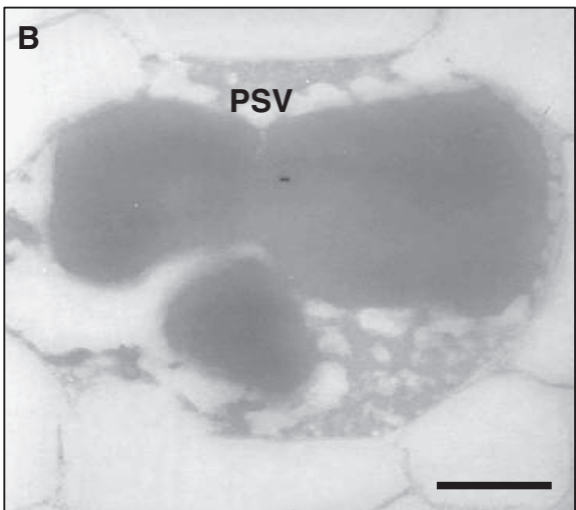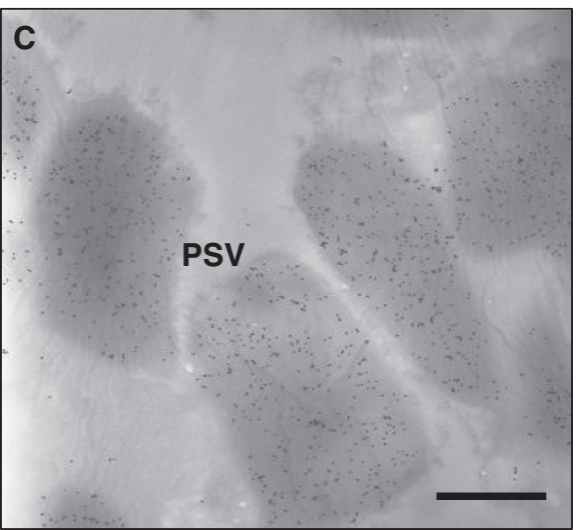

Supplement: 12284_2012_37_MOESM3_ESM.pdf [file 12284_2012_37_MOESM3_ESM.pdf]
